# Supplementary material
Source: PubMed Central journal article supplement (PMC6017684)
Supplement: epcu-18-3-172_s01.pdf [file epcu-18-3-172_s01.pdf]

No conflict of interest disclosure submitted by author as of date of publication.

Author info: Devin K. Binder, M.D., Ph.D.

Associate Professor

Center for Glial-Neuronal Interactions

Neuroscience Graduate Program

Bioengineering Interdepartmental Graduate (BIG) Program

Division of Biomedical Sciences

School of Medicine

University of California, Riverside

[dbinder@ucr.edu](mailto:dbinder@ucr.edu)

[www.binderlab.com](http://www.binderlab.com)

---
